# Supplementary material
Source: MDPI journal article supplement (https://www.mdpi.com/1424-2818/10/3/69)
Supplement: s1 [file s1]

**Table S1.** *M. menidia*. Collection and length data of adult silversides used to fertilize embryos for five CO<sub>2</sub> × temperature experiments. Adult lengths (cm) are shown as total lengths (TL, mean ± SD).

| Experiment | Collection Date | Collection Site  | # Female Spawners | Female TL (cm) | # Male Spawners | Male TL (cm) |
|------------|-----------------|------------------|-------------------|----------------|-----------------|--------------|
| 1          | 5/4/2014        | Setauket, NY     | 29                | 8.9 ± 1.5      | 24              | 8.0 ± 1.2    |
| 2          | 4/20/2016       | Mumford Cove, CT | 12                | 10.4 ± 1.4     | 33              | 8.3 ± 1.0    |
| 3          | 5/18/2016       | Mumford Cove, CT | 32                | 10.3 ± 1.3     | 40              | 8.7 ± 1.1    |
| 4          | 4/27/2017       | Mumford Cove, CT | 37                | 6.9 ± 1.2      | 48              | 7.5 ± 1.1    |
| 5          | 5/25/2017       | Mumford Cove, CT | 24                | 8.7 ± 1.0      | 26              | 8.4 ± 1.0    |
